# Supplementary material for: Bio-based palladium catalyst in cryogel for cross-coupling reactions
Source: Royal Society of Chemistry journal article supplement (doi:10.1039/d4qm00800f), 2024-01-01
Supplement: d4qm00800f1.pdf [file d4qm00800f1.pdf]

# Supporting Information

## Bio-Based Palladium Catalyst in Cryogel for Cross-Coupling Reactions

Elisabetta Grazia Tomarchio,<sup>a,b</sup> Chiara Zagni,\*<sup>a</sup> Vincenzo Paratore,<sup>c</sup> Guglielmo Guido Condorelli,<sup>c</sup> Sabrina Carola Carroccio,<sup>d</sup> Antonio Rescifina<sup>a</sup>

<sup>a</sup>Department of Drug and Health Sciences, University of Catania, V.le A. Doria 6, 95125, Catania, Italy

<sup>b</sup>Department of Biomedical and Biotechnological Sciences, University of Catania, Via Santa Sofia 97, 95123 Catania, Italy

<sup>c</sup>Department of Chemical Science, Università degli Studi di Catania, Viale Andrea Doria 6, 95125, Catania, Italy

<sup>d</sup>Institute for Polymers, Composites, and Biomaterials CNR-IPCB, Via Paolo Gaifami 18, 95126, Catania, Italy

\*Correspondence: [chiara.zagni@unict.it](mailto:chiara.zagni@unict.it) (C.Z.)

### Table of Contents

- 1 NMR Spectra of Pheb and PhebPd
2. Porosimetric analysis
3. EDX analysis
4. Swelling ratio
5. Characterization Data and <sup>1</sup>H NMR Spectra of Suzuki reaction products

# 1. NMR Spectra of PheB (3) and PheBPd (4)

## *N*-(4-vinylbenzyl)phenylalanine (Pheb) (3)

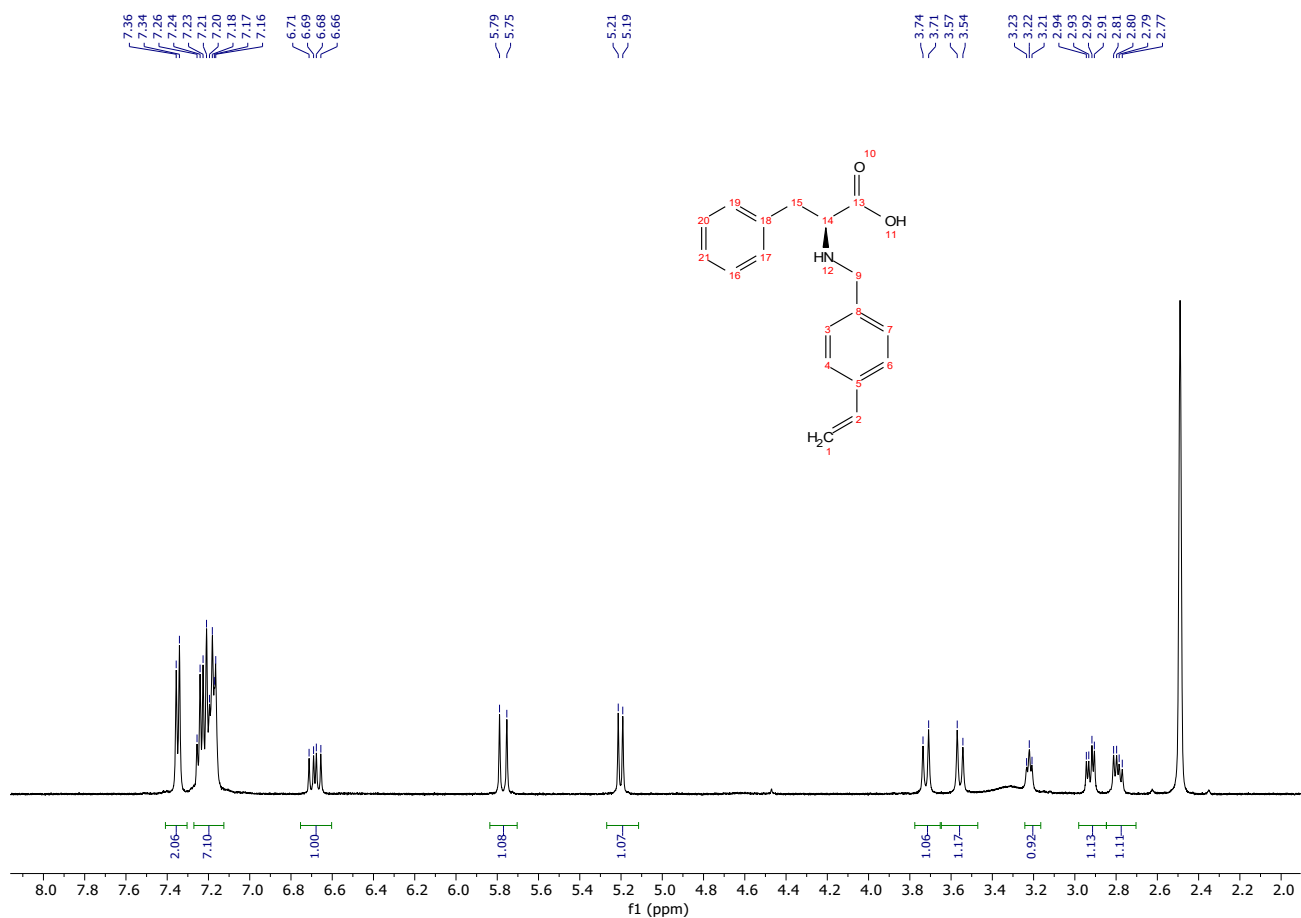

Figure S1. <sup>1</sup>H NMR spectrum of Pheb 3.

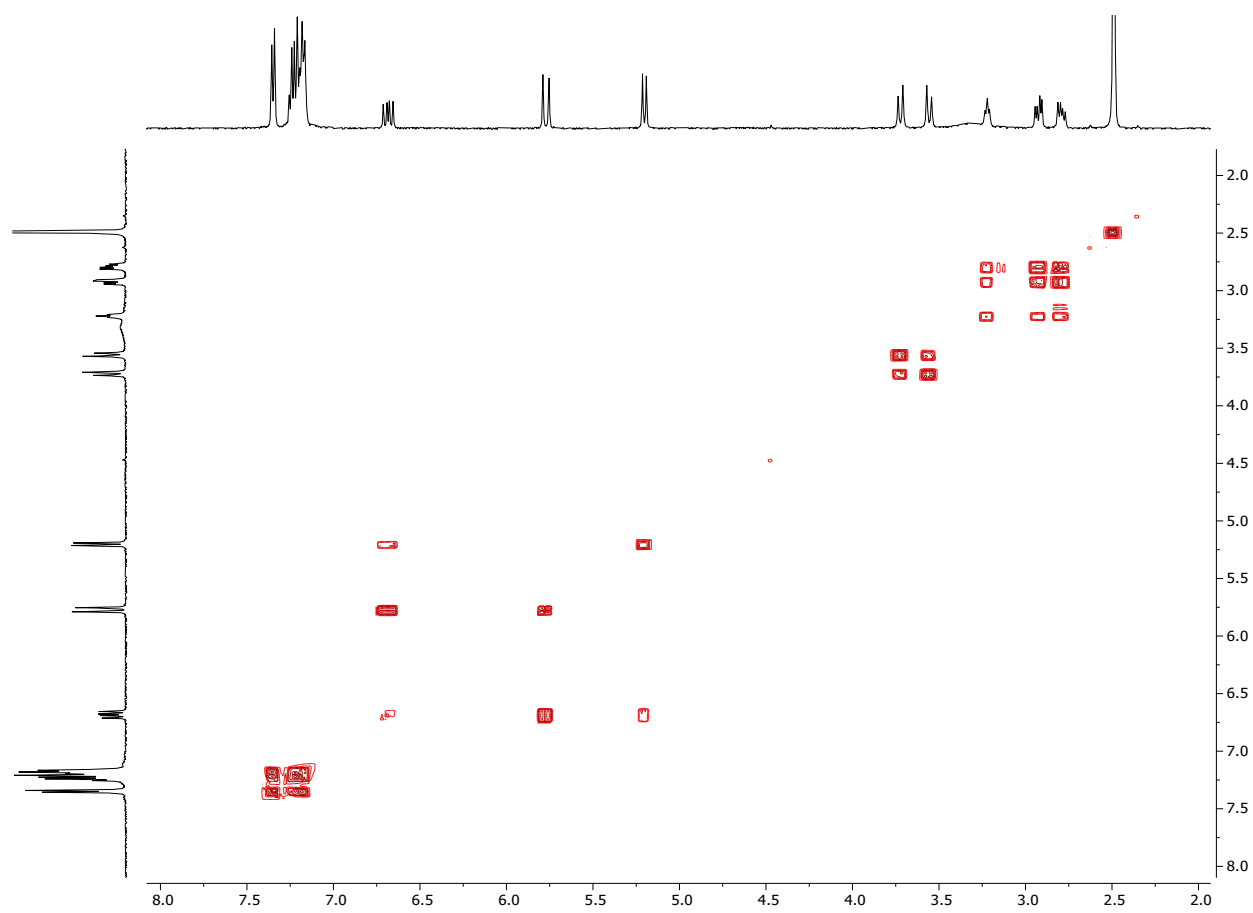

**Figure S2.** gCOSY spectrum of Pheb 3.

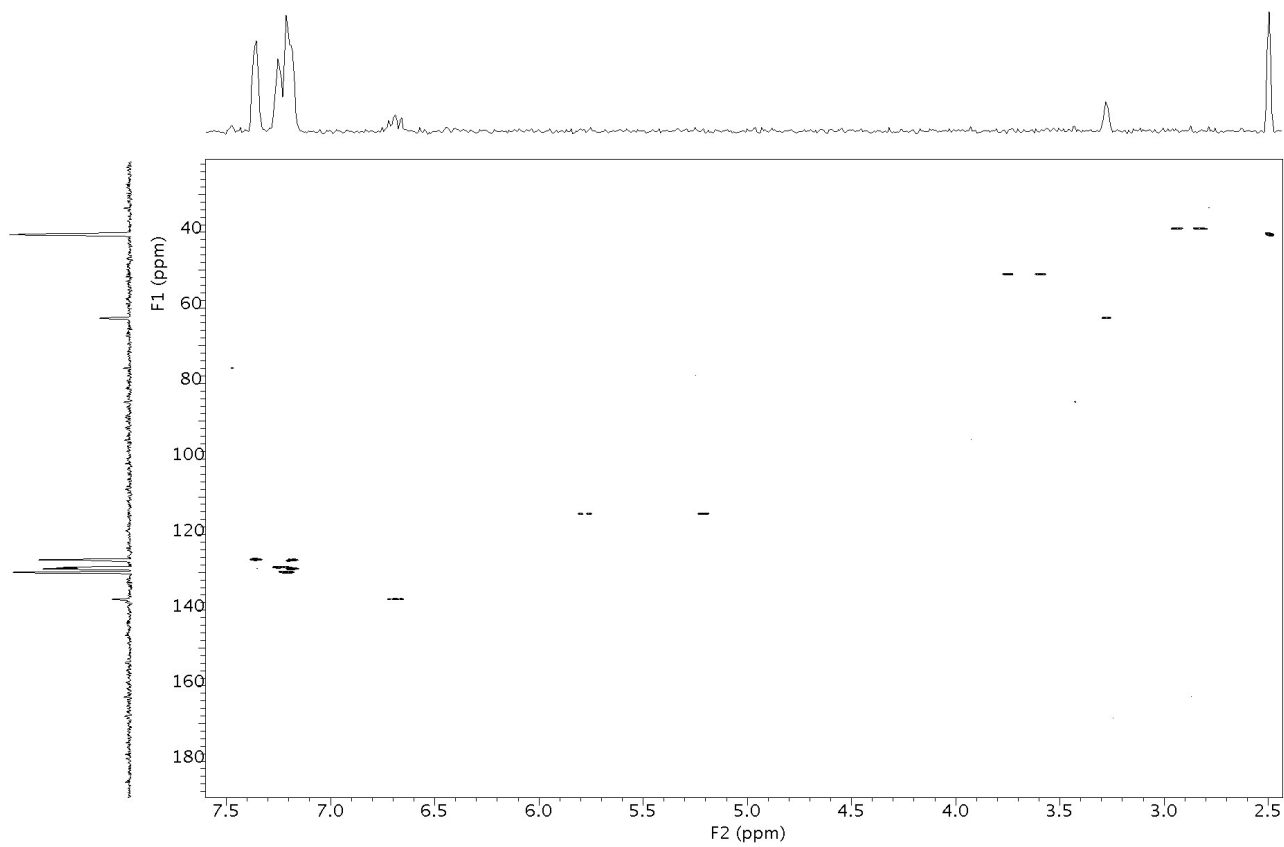

**Figure S3.** gHSQC spectrum of Pheb 3

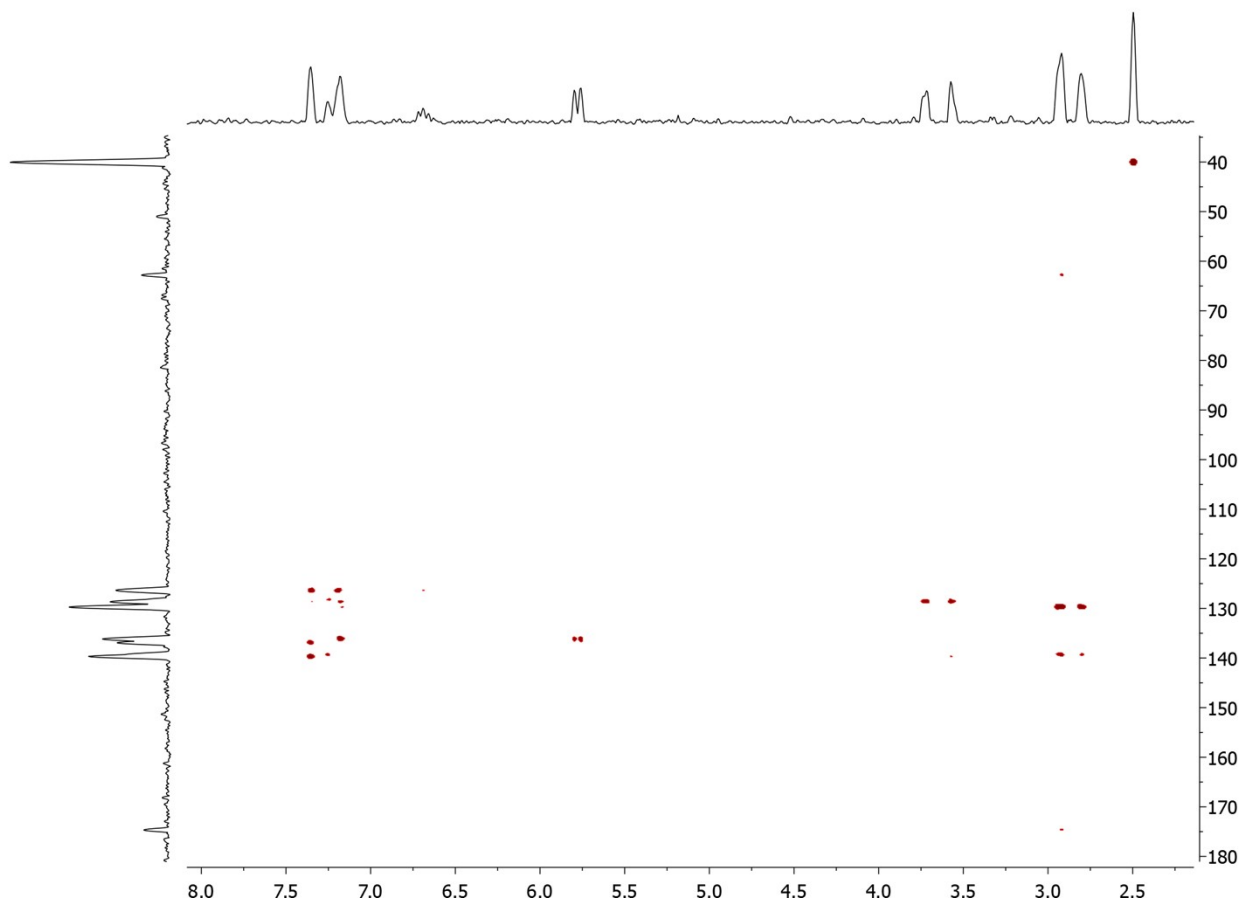

**Figure S4.** gHMBC spectrum of Pheb **3**

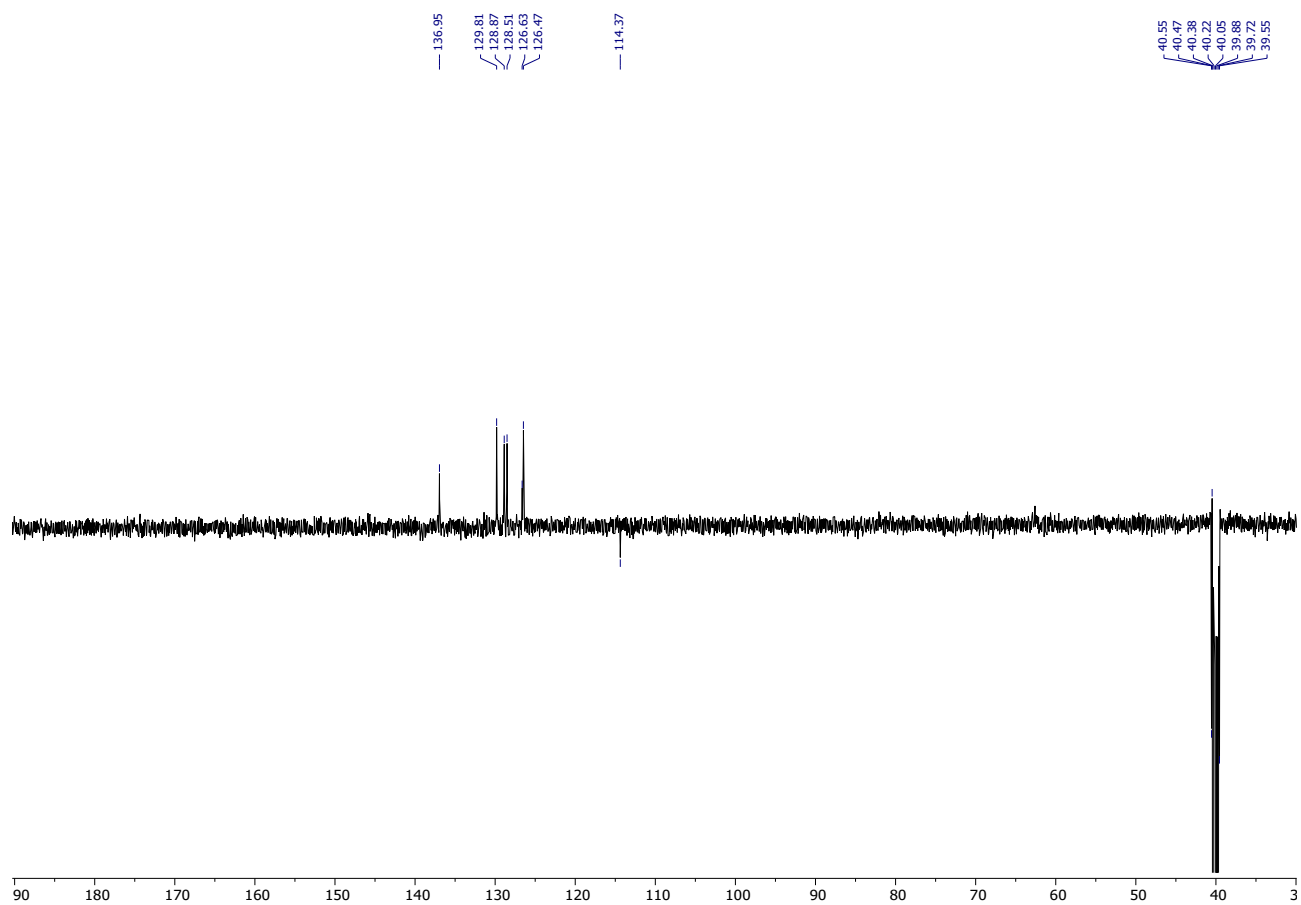

**Figure S5.** APT spectrum of Pheb 3

**Bis-[*N*-(4-vinylbenzyl)phenylalanine]palladium(II) complex (PhebPd) (4)**

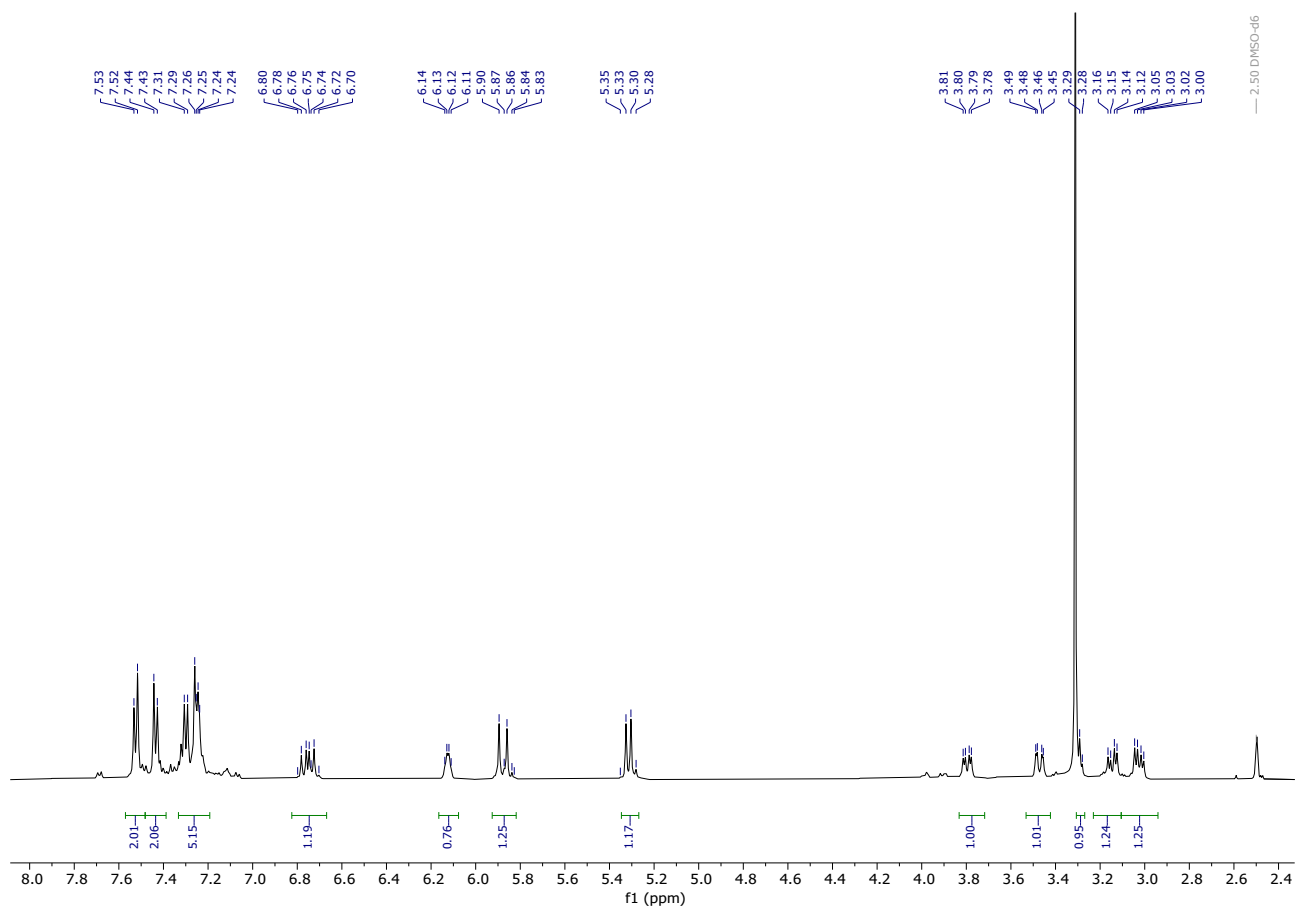

**Figure S6.**  $^1\text{H}$  NMR spectrum of PhebPd **4**.

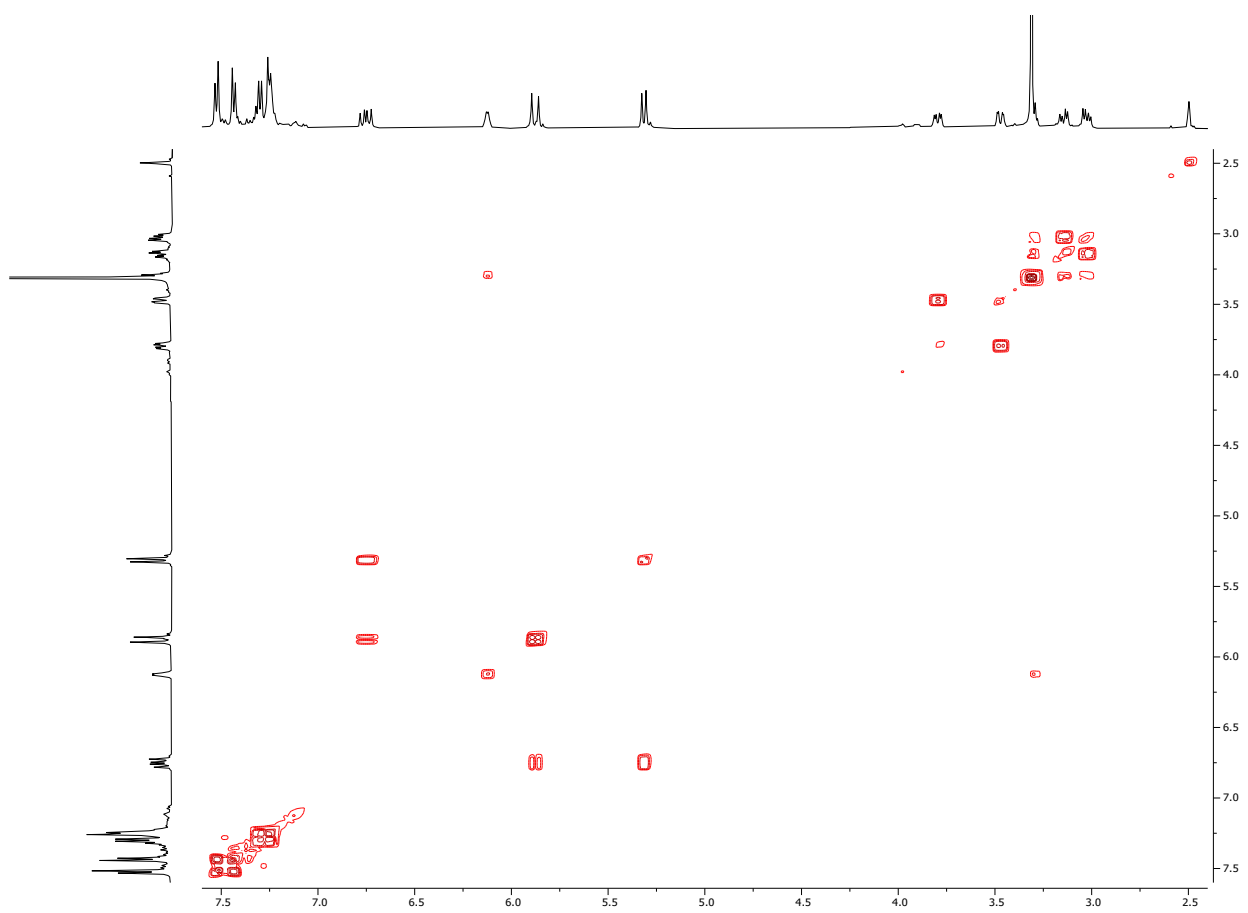

**Figure S7.** gCOSY spectrum of PhebPd 4.



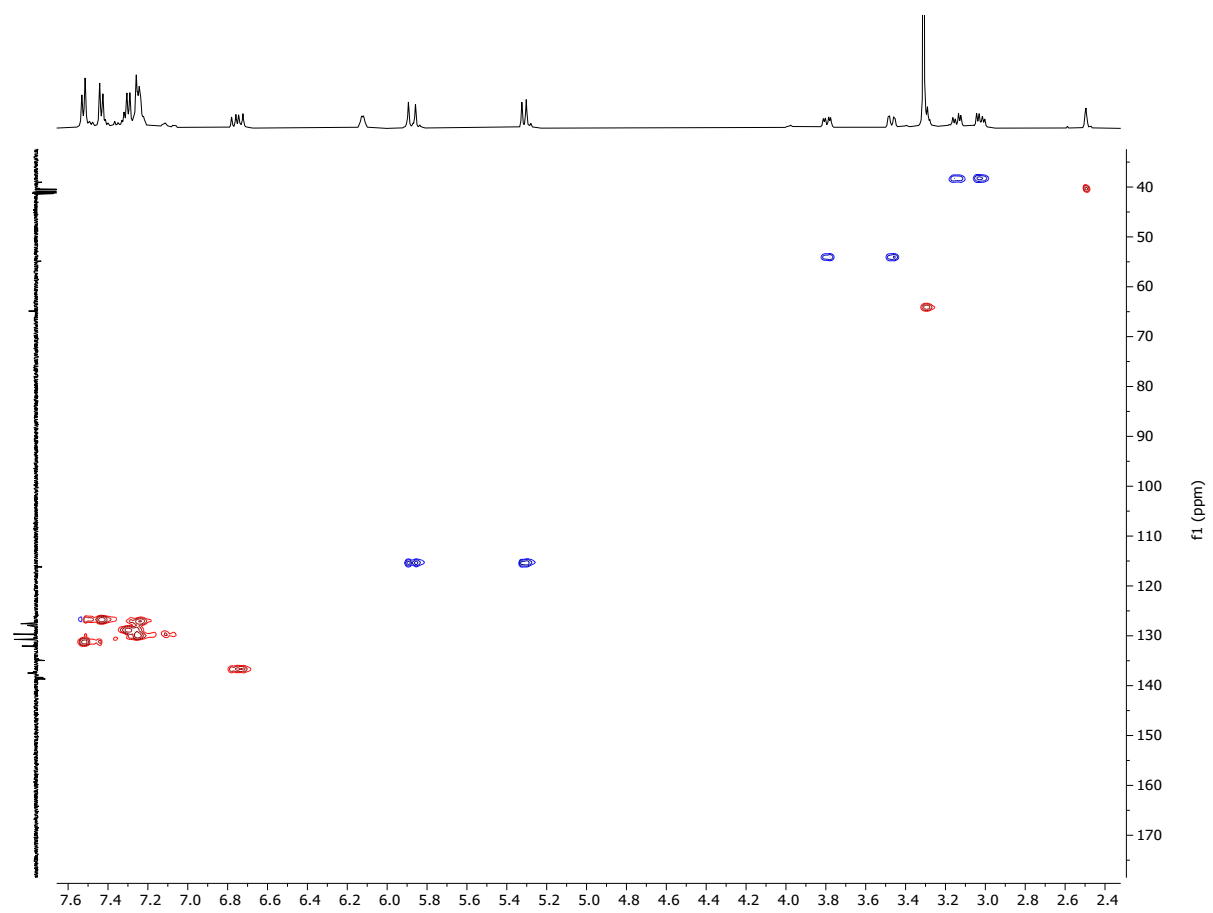

Figure S8. gHSQC spectrum of PhebPd 4.

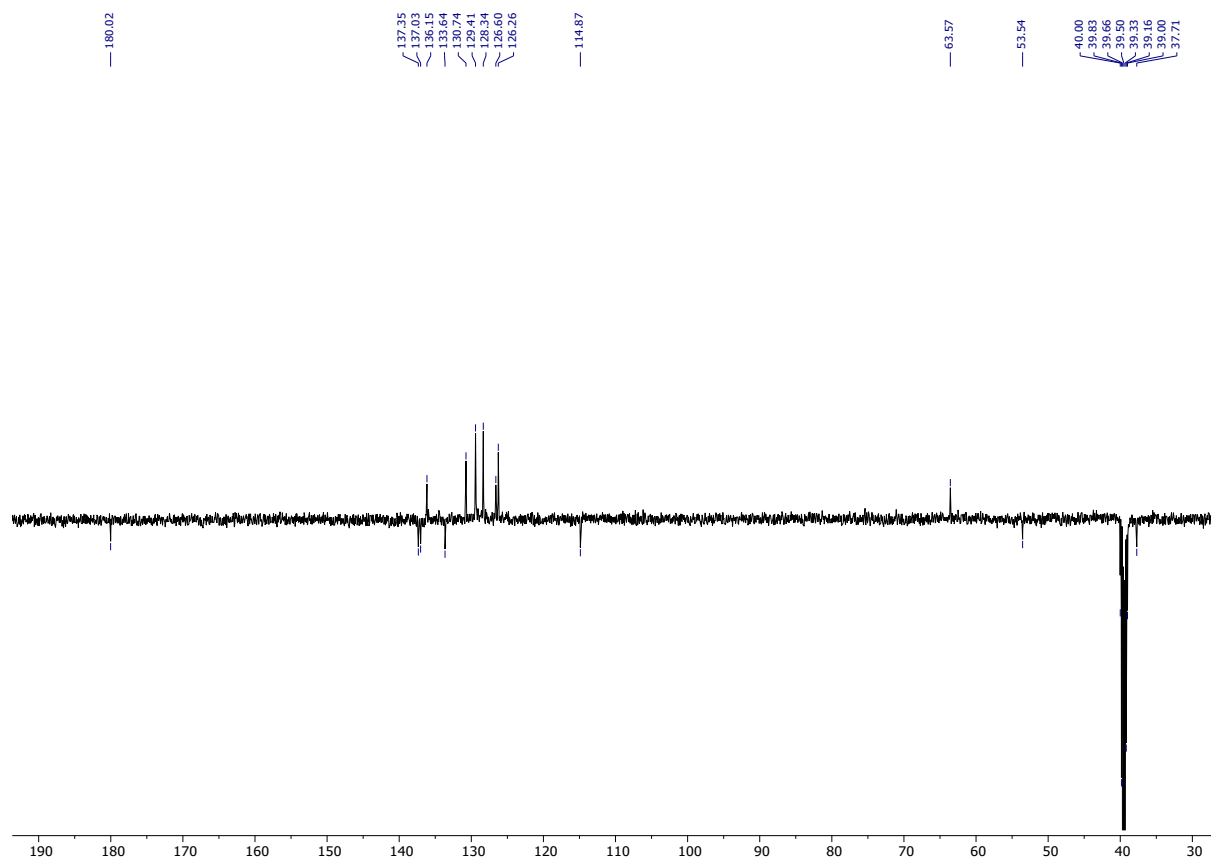

Figure S9. APT spectrum of PhebPd 4.

## 2. Porosimetric analysis

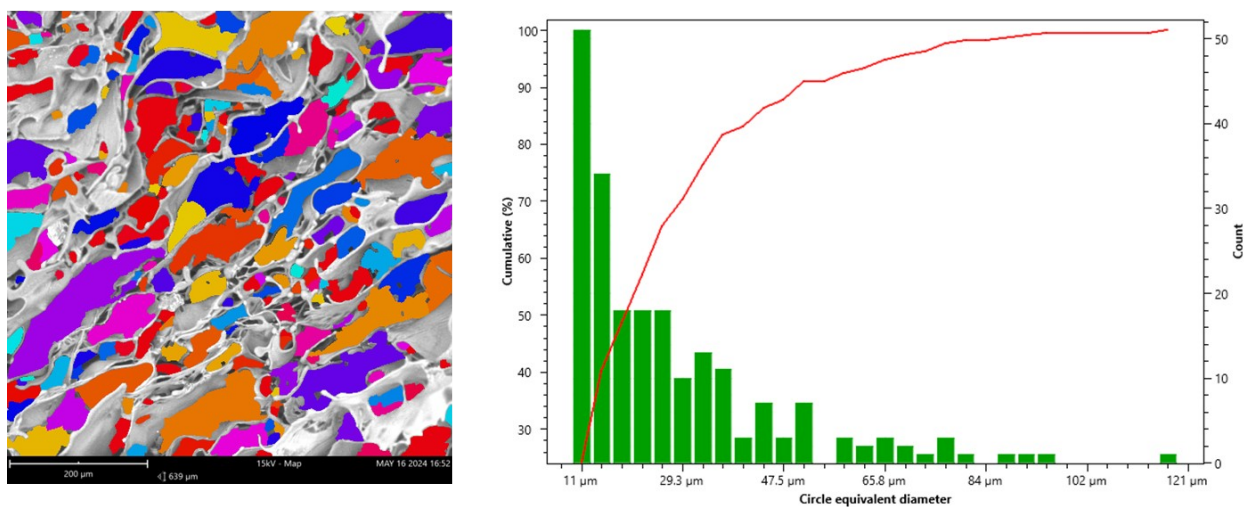

**Figure S10.** Porosimetric distribution of C-PhebPd.

**Table S1.**

| <b>Property</b>               | <b>Median</b>                      | <b>Average</b>                     |
|-------------------------------|------------------------------------|------------------------------------|
| Circle equivalent diameter    | 22.7 $\mu\text{m}$                 | 28.7 $\mu\text{m}$                 |
| Major axis                    | 29.9 $\mu\text{m}$                 | 41.6 $\mu\text{m}$                 |
| Minor axis                    | 16 $\mu\text{m}$                   | 20.4 $\mu\text{m}$                 |
| Circumference                 | 88.5 $\mu\text{m}$                 | 121 $\mu\text{m}$                  |
| Convex hull                   | 85.1 $\mu\text{m}$                 | 111 $\mu\text{m}$                  |
| Circumscribed circle diameter | 34 $\mu\text{m}$                   | 46.8 $\mu\text{m}$                 |
| Area                          | 403 $\mu\text{m}^2$                | 927 $\mu\text{m}^2$                |
| Volume by area                | 6.09 $\times 10^3$ $\mu\text{m}^3$ | 3.50 $\times 10^4$ $\mu\text{m}^3$ |

### 3. EDX analysis

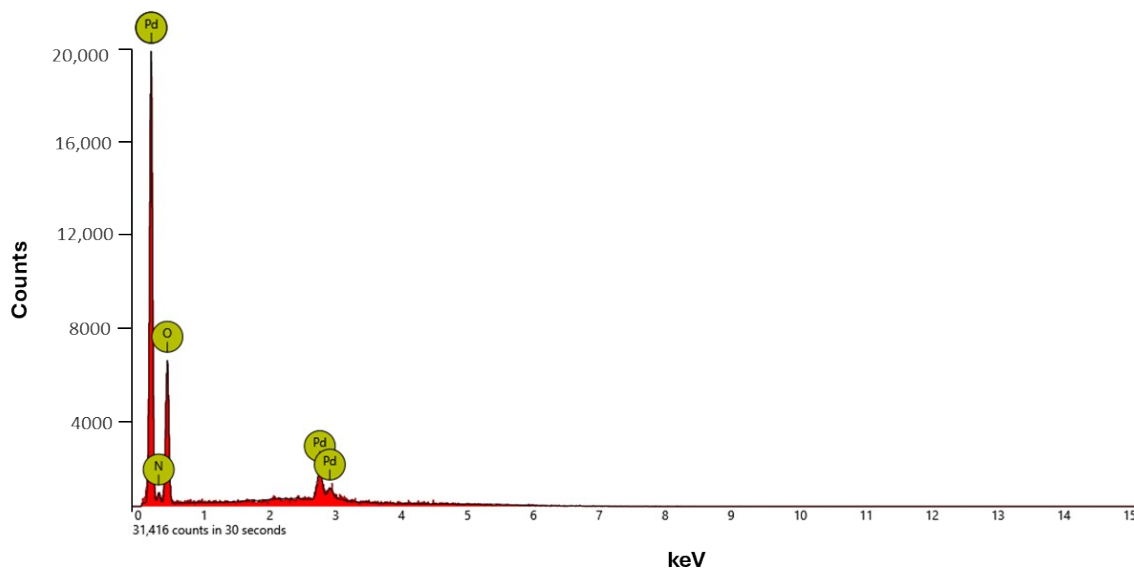

Figure S11. EDX of C-PhebPd.

### 4. Swelling ratio

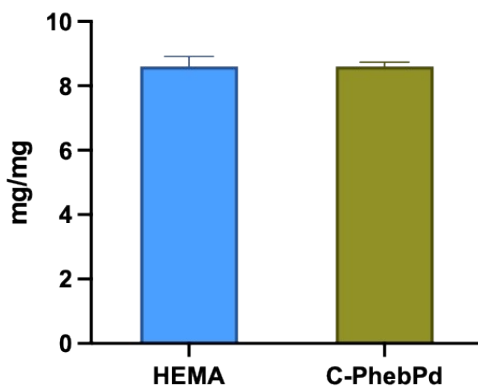

Figure S12. Swelling ratio of C-PhebPd compared with a cryogel of HEMA.

## 5. Characterization Data and $^1\text{H}$ NMR Spectra of Suzuki reaction products

### [1,1'-biphenyl]-4-carbaldehyde

$^1\text{H}$  NMR (500 MHz,  $\text{CDCl}_3$ )  $\delta$  9.91 (s, 1H), 7.81 (d,  $J = 7.8$  Hz, 2H), 7.61 (d,  $J = 7.9$  Hz, 2H), 7.49 (d,  $J = 7.5$  Hz, 2H), 7.34 (t,  $J = 7.6$  Hz, 2H), 7.31–7.26 (m, 1H).

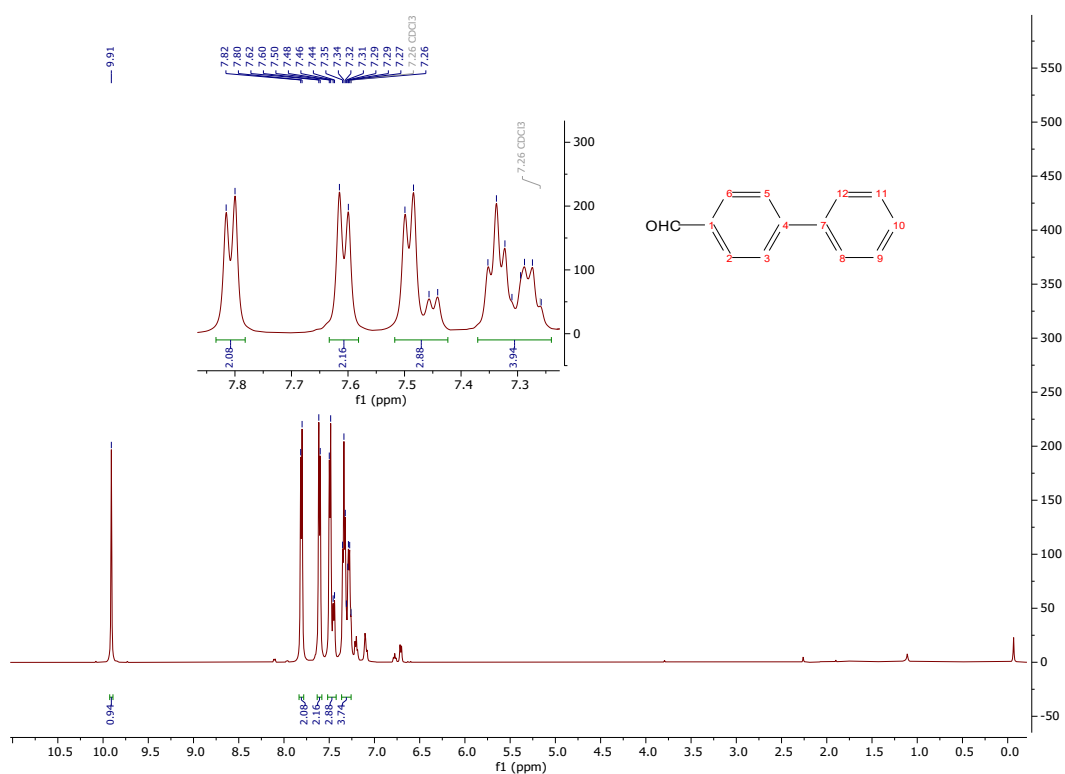

Figure S13.  $^1\text{H}$  NMR of [1,1'-biphenyl]-4-carbaldehyde.

## 1,1'-biphenyl

$^1\text{H}$  NMR (500 MHz,  $\text{CDCl}_3$ )  $\delta$  7.60 (d,  $J = 7.5$  Hz, 2H), 7.45 (t,  $J = 7.6$  Hz, 2H), 7.35 (t,  $J = 7.4$  Hz, 1H)

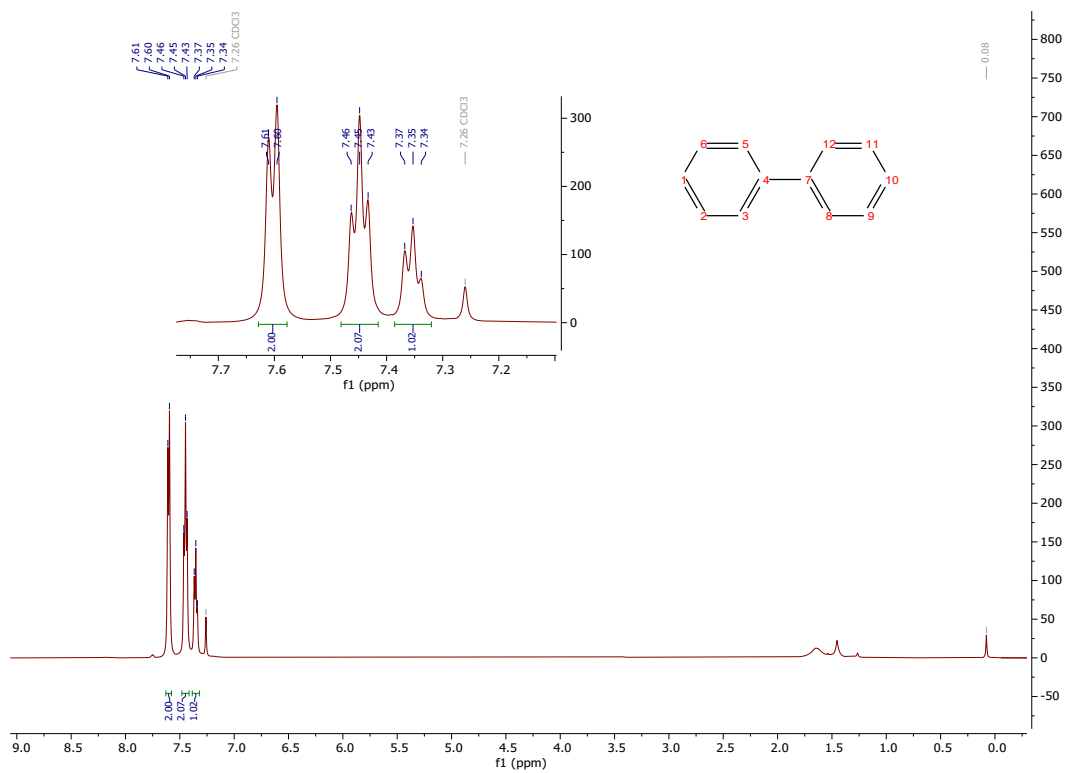

Figure S14.  $^1\text{H}$  NMR of 1,1'-biphenyl.

## 2-(4-methoxyphenyl)furan

$^1\text{H}$  NMR (500 MHz,  $\text{CDCl}_3$ )  $\delta$  7.61 (d,  $J = 8.3$  Hz, 2H), 7.43 (s, 1H), 6.92 (d,  $J = 8.3$  Hz, 2H), 6.51 (d,  $J = 3.3$  Hz, 1H), 6.45 (d,  $J = 3.3$  Hz, 1H), 3.84 (s, 3H).

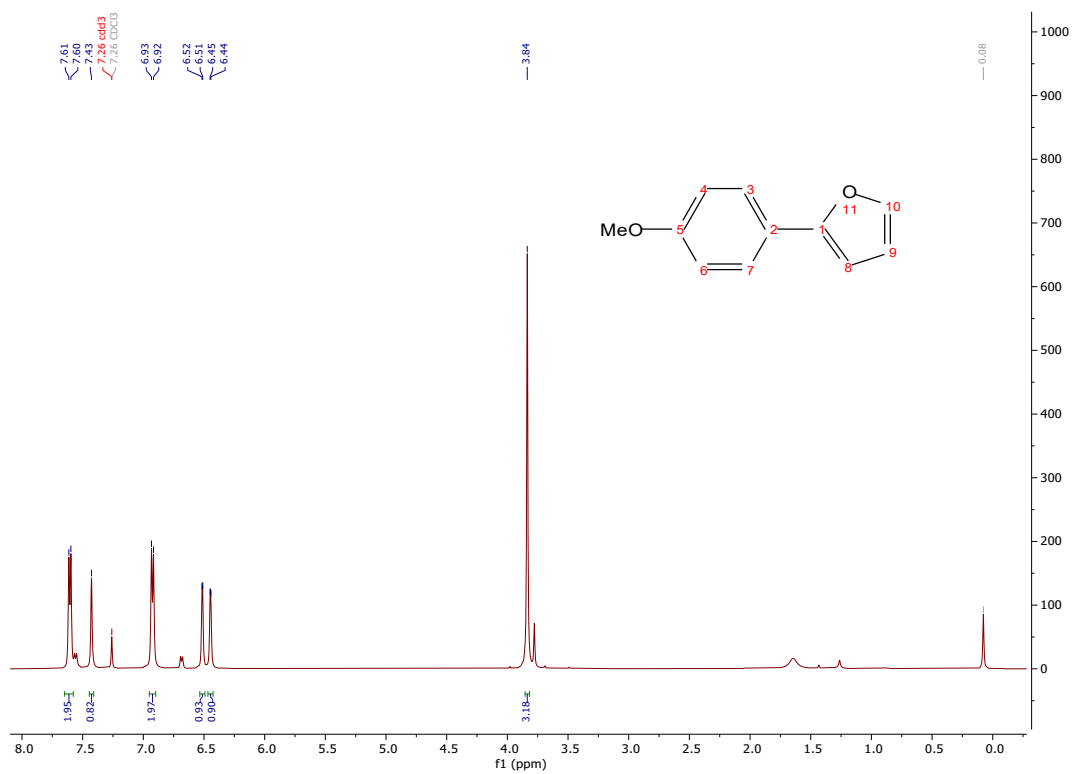

Figure S15.  $^1\text{H}$  NMR of 2-(4-methoxyphenyl)furan.

## 2-(4-methoxyphenyl)thiophene

$^1\text{H}$  NMR (500 MHz,  $\text{CDCl}_3$ )  $\delta$  7.55 (d,  $J = 8.2$  Hz, 2H), 7.21 (dd,  $J = 7.3, 4.3$  Hz, 2H), 7.06 (t,  $J = 4.4$  Hz, 1H), 6.92 (d,  $J = 8.2$  Hz, 2H), 3.84 (s, 3H).

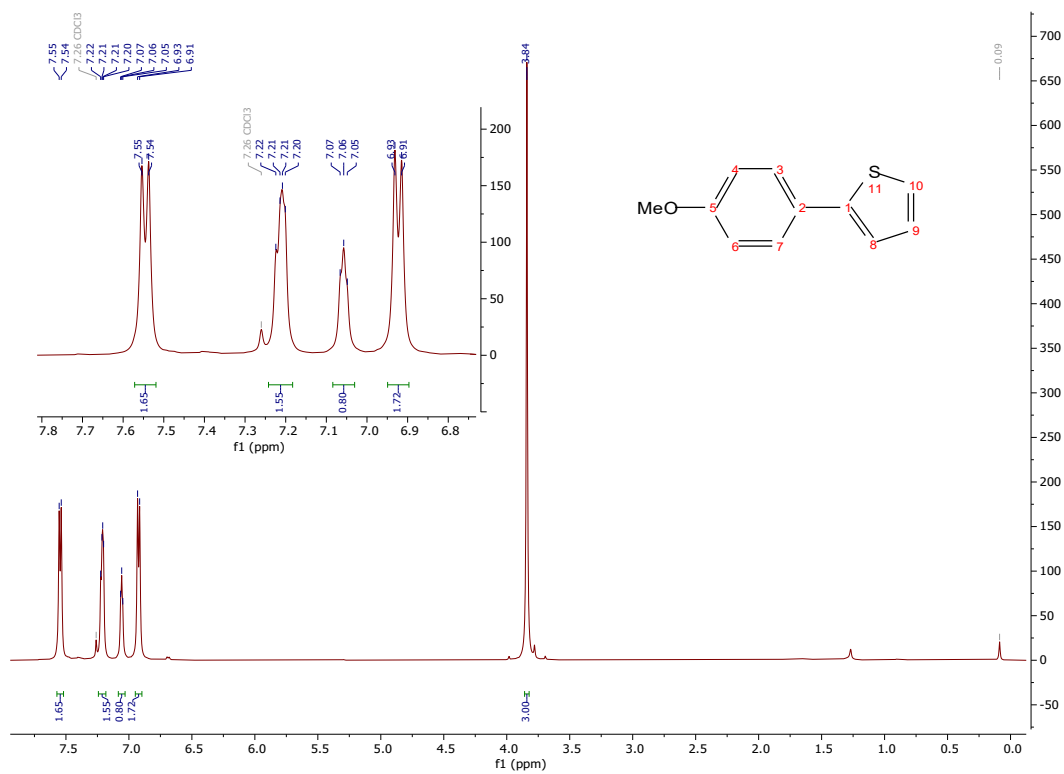

Figure S16.  $^1\text{H}$  NMR of 2-(4-methoxyphenyl)thiophene.



## 2-phenylfuran

$^1\text{H}$  NMR (500 MHz,  $\text{CDCl}_3$ )  $\delta$  7.60–7.54 (m, 2H), 7.36 (d,  $J = 1.9$  Hz, 1H), 7.28 (t,  $J = 7.6$  Hz, 2H), 7.18–7.12 (m, 1H), 6.54 (d,  $J = 3.3$  Hz, 1H), 6.37 (dd,  $J = 3.5, 1.8$  Hz, 1H).

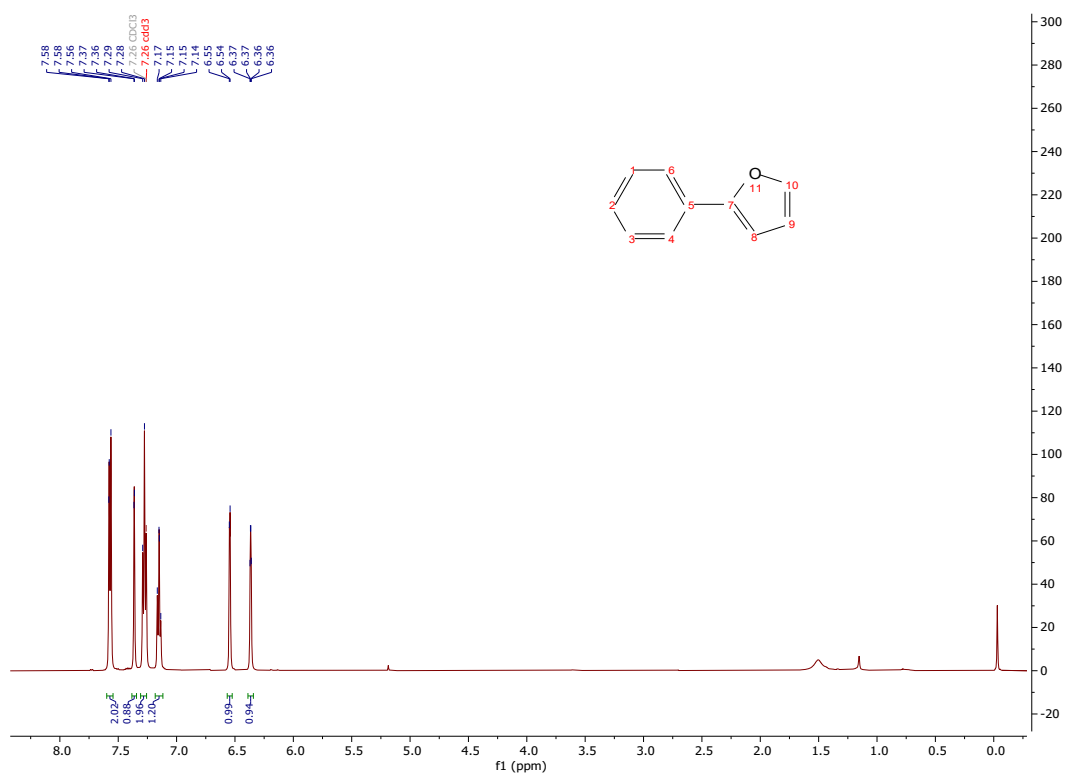

Figure S17.  $^1\text{H}$  NMR of 2-phenylfuran.

## 2-phenylthiophene

$^1\text{H}$  NMR (500 MHz,  $\text{CDCl}_3$ )  $\delta$  7.54 (d,  $J = 7.7$  Hz, 2H), 7.31 (t,  $J = 7.6$  Hz, 2H), 7.26–7.17 (m, 3H), 7.01 (t,  $J = 4.3$  Hz, 1H).

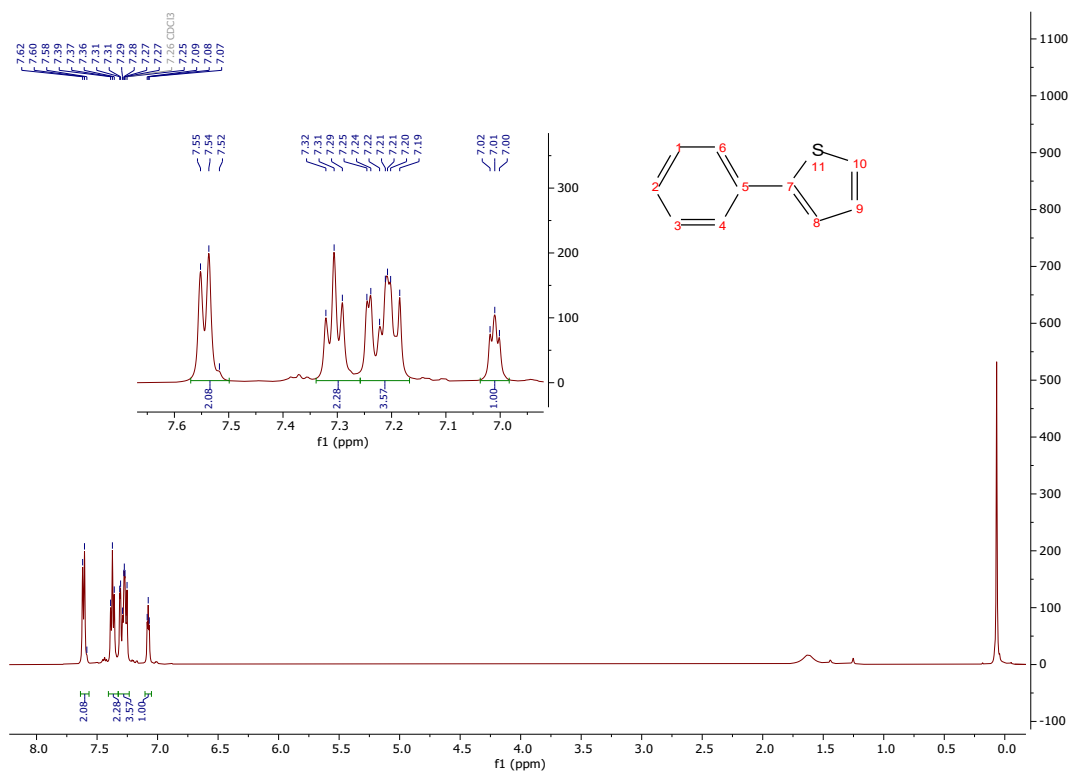

**Figure S18.**  $^1\text{H}$  NMR of 2-phenylthiophene.

## 2,4-dimethoxy-5-phenylpyrimidine

$^1\text{H}$  NMR (500 MHz,  $\text{CDCl}_3$ )  $\delta$  8.26 (s, 1H), 7.49 (d,  $J = 7.6$  Hz, 2H), 7.43 (t,  $J = 7.6$  Hz, 2H), 7.37 (d,  $J = 7.3$  Hz, 1H), 4.04 (d,  $J = 9.1$  Hz, 6H).

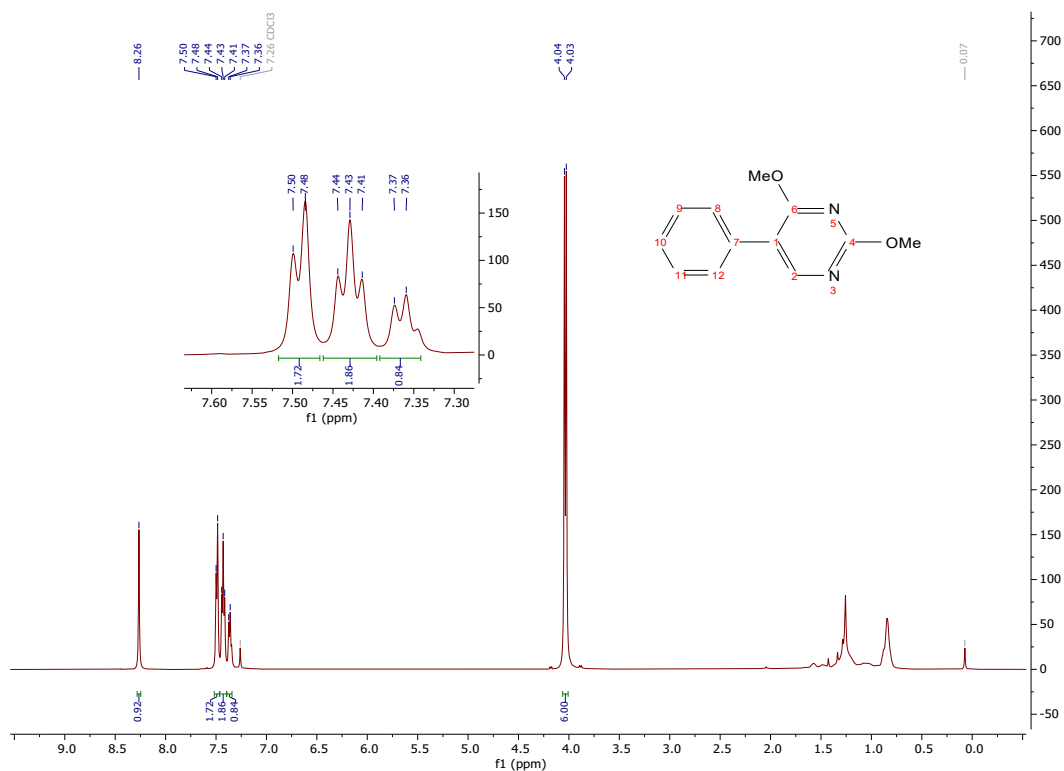

**Figure S19.**  $^1\text{H}$  NMR of 2,4-dimethoxy-5-phenylpyrimidine.

### 4-(furan-2-yl)benzaldehyde

$^1\text{H}$  NMR (500 MHz,  $\text{CDCl}_3$ )  $\delta$  9.99 (s, 1H), 7.90 (d,  $J = 8.0$  Hz, 2H), 7.82 (d,  $J = 8.0$  Hz, 2H), 7.55 (s, 1H), 6.85 (d,  $J = 3.5$  Hz, 1H), 6.53 (d,  $J = 2.6$  Hz, 1H).

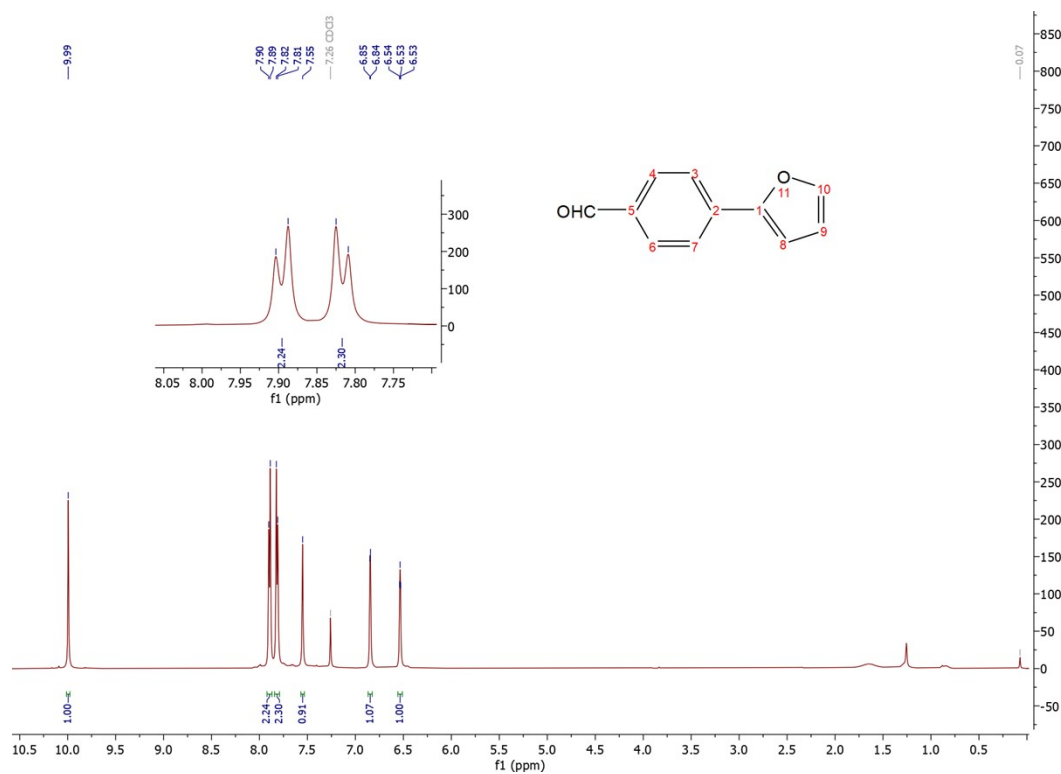

Figure S20.  $^1\text{H}$  NMR of 4-(furan-2-yl)benzaldehyde.

### 4-(thiophen-2-yl)benzaldehyde

$^1\text{H}$  NMR (400 MHz,  $\text{CDCl}_3$ )  $\delta$  10.00 (s, 1H), 7.93–7.85 (m, 2H), 7.81–7.72 (m, 2H), 7.47 (dd,  $J = 3.7, 1.1$  Hz, 1H), 7.40 (dd,  $J = 5.1, 1.1$  Hz, 1H), 7.14 (dd,  $J = 5.1, 3.7$  Hz, 1H).

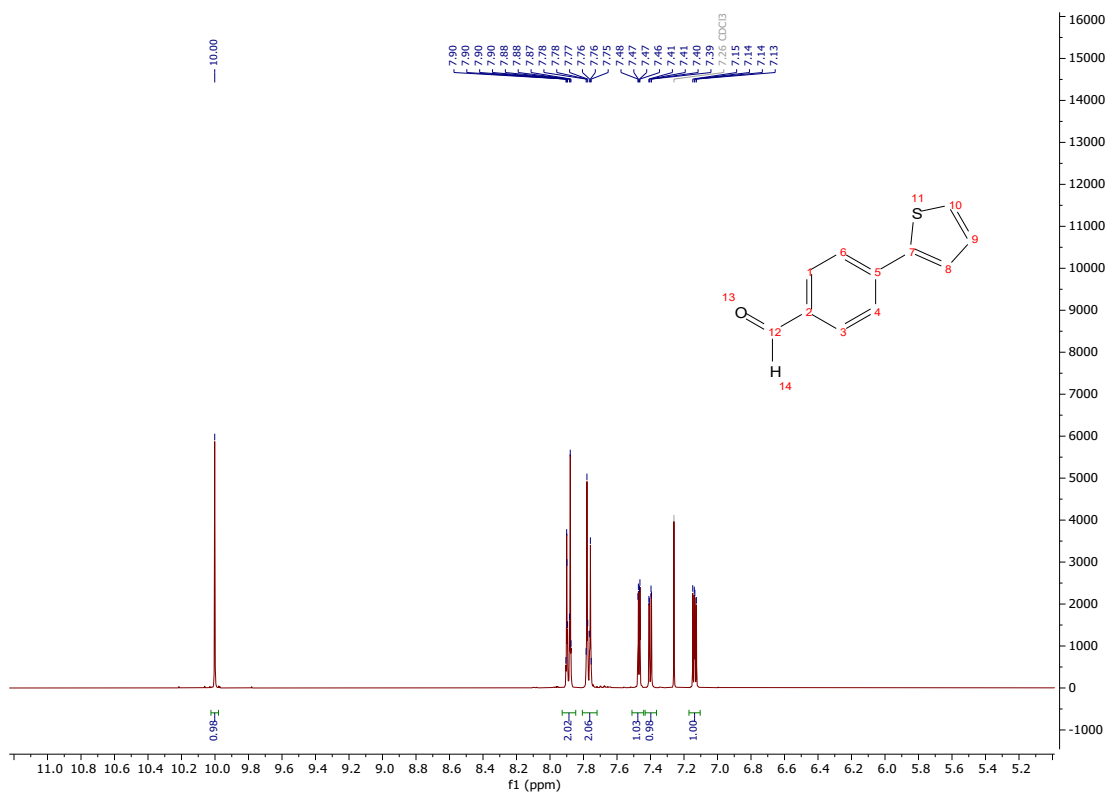

Figure S21.  $^1\text{H}$  NMR of 4-(thiophen-2-yl)benzaldehyde.

### 4-methoxy-1,1'-biphenyl

$^1\text{H}$  NMR (500 MHz,  $\text{CDCl}_3$ )  $\delta$  7.58–7.51 (m, 4H), 7.42 (t,  $J = 7.5$  Hz, 2H), 7.31 (d,  $J = 7.4$  Hz, 1H), 6.99 (d,  $J = 8.2$  Hz, 2H), 3.86 (s, 3H).

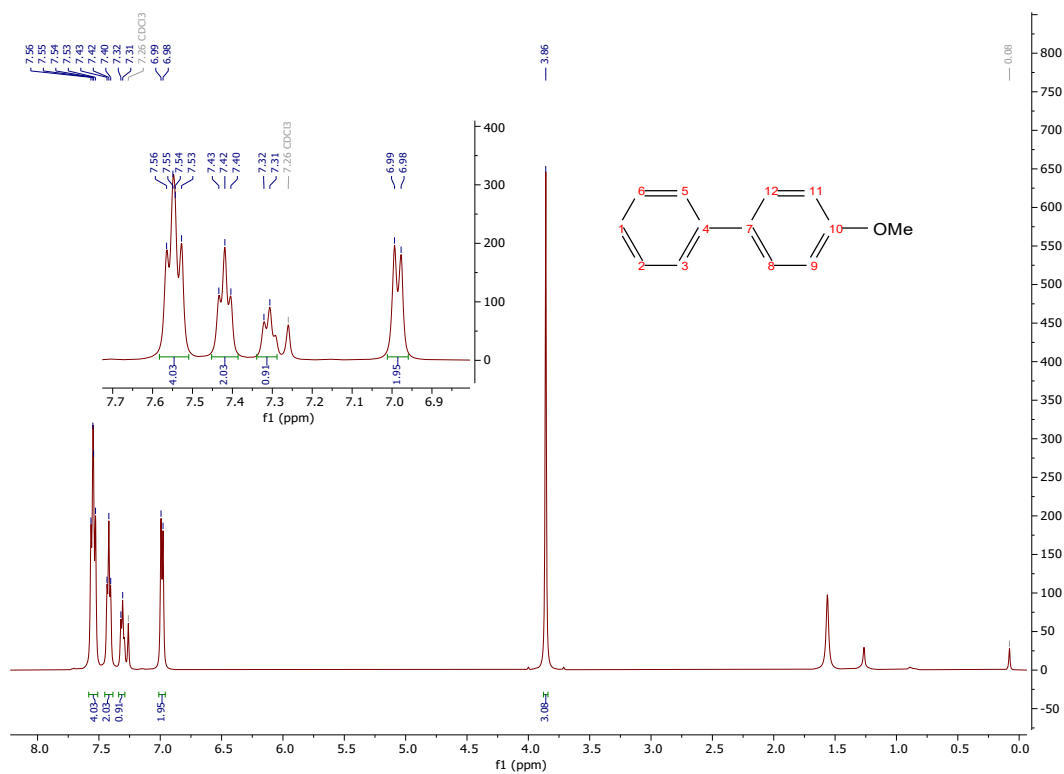

Figure S22.  $^1\text{H}$  NMR of 4-methoxy-1,1'-biphenyl.

### 4-nitro-3-(trifluoromethyl)-1,1'-biphenyl

$^1\text{H}$  NMR (500 MHz,  $\text{CDCl}_3$ )  $\delta$  8.00 (d,  $J = 11.4$  Hz, 2H), 7.90 (d,  $J = 8.4$  Hz, 1H), 7.62 (d,  $J = 7.7$  Hz, 2H), 7.52 (dt,  $J = 13.8, 7.3$  Hz, 3H).

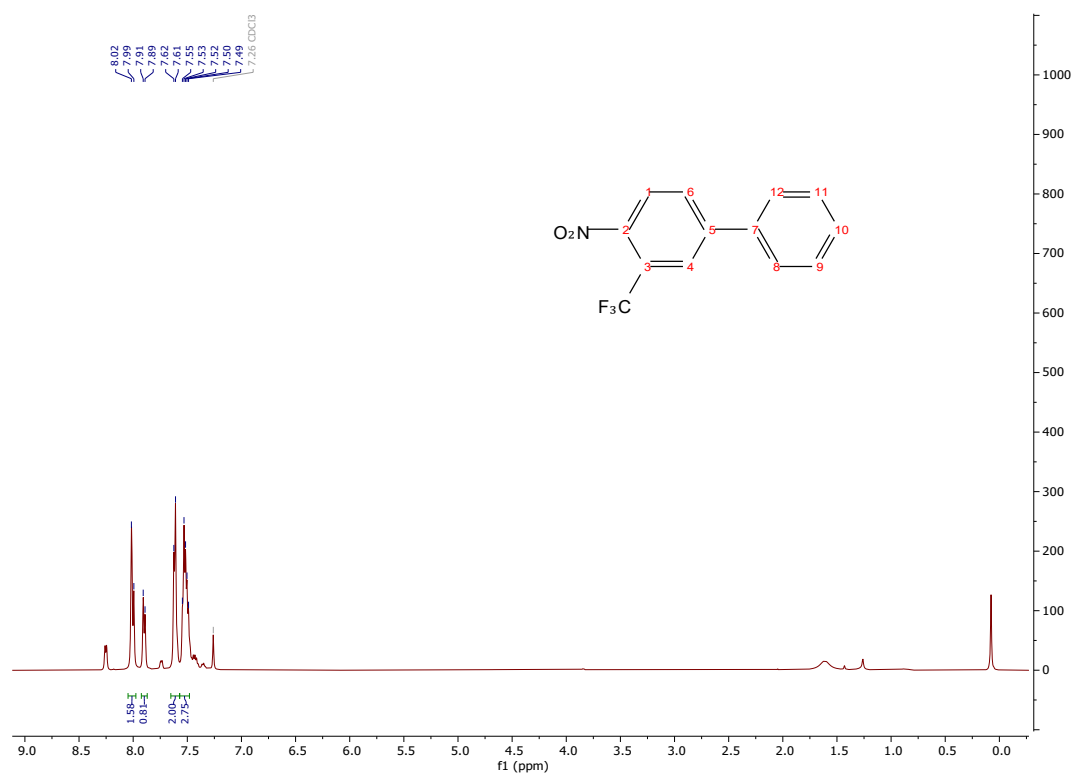

**Figure S23.**  $^1\text{H}$  NMR of 4-nitro-3-(trifluoromethyl)-1,1'-biphenyl.
